1        **The Dawn is Coming —— the Description and Prediction of Omicron SARS**  
2                    **CoV-2 Epidemic Outbreak in Shanghai by Mathematical Modeling**

3    Minghao Jiang<sup>1, \*</sup>, Guoyu Meng<sup>1, \*, #</sup>, Geng Wu<sup>2, \*, #</sup>

4    <sup>1</sup>Shanghai Institute of Hematology, State Key Laboratory of Medical Genomics,  
5    National Research Center for Translational Medicine, Rui-Jin Hospital, Shanghai Jiao  
6    Tong University School of Medicine and School of Life Sciences and Biotechnology,  
7    Shanghai Jiao Tong University, 197 Ruijin Er Road, Shanghai 200025, China

8    <sup>2</sup>State Key Laboratory of Microbial Metabolism, School of Life Science and  
9    Biotechnology, The Joint International Research Laboratory of Metabolic &  
10    Developmental Sciences, Shanghai Jiao Tong University, Shanghai, China

11    \* equal contribution

12    # corresponding authors

13    E-mail: [guoyumeng@shsmu.edu.cn](mailto:guoyumeng@shsmu.edu.cn); [geng.wu@sjtu.edu.cn](mailto:geng.wu@sjtu.edu.cn)

14    Tel: 0086 (0) 2164370045-610730

15    Fax: 0086 (0) 2164743206

16    **KEYWORDS:** SARS-CoV-2 Omicron, Shanghai outbreak, Prediction model

17

18

## 19 **Abstract**

20       The Omicron outbreak in Shanghai has been going on for more than a month  
21 although the lockdown of the city has been enforced. In this work, we present a simple  
22 and easy-to-use model to evaluate and forecast the spreading trend. After data fitting,  
23 we concluded that the maximum overall number infected in Shanghai will exceed  
24 300,000 and the turning point will be in the coming days around April 13-15, 2022. Our  
25 model would provide us important parameters such as the average quarantine ratio, the  
26 detection interval from being infected to being tested positive, and the spreading  
27 coefficient. We found that it would take 1 to 2 days before the infected patients could  
28 be tested positive, which was responsible for the rapid Omicron spread in Shanghai.  
29 Furthermore, the quarantine ratio was greater than 1, indicating that the lockdown  
30 policy was effective, making quelling the epidemic possible. More importantly, our  
31 model could not only enable us to predict the spreading precisely, but also lay the  
32 theoretical foundation for better policy making in the prevention of Omicron spread.

33

## 34 **Introduction**

35       The SARS-CoV-2 Omicron variant, reported as a new variant of COVID-19 in  
36 November, 2021[1], has broken out in Shanghai recently. This variant carries mutations  
37 to help the virus to resist or escape immunity provided by COVID-19 vaccines[1-3]. To  
38 prevent the spread of infection, the local government of Shanghai municipal decided to  
39 enforce a lockdown on March 28. However, in the past week, there were still over  
40 20,000 Omicron cases confirmed per day, including both diagnosed and asymptomatic.

---

41 The situation was quite severe when compared to other places across mainland China  
42 during the same period or that in Shanghai several months ago. Here, we propose a new  
43 mathematical model to evaluate the epidemic trend of Omicron spreading in Shanghai  
44 and make forecasts for the near future.

45

## 46 **Materials and methods**

### 47 **Data used in modeling**

48 The case numbers were collected manually from officially released reports (**Table 1**).

49

### 50 **Mathematical modeling**

51 First, a differential equation is deducted to describe the spreading of COVID-19 as  
52 following. Let us denote  $s(t)$  as the number of people whose nucleic acid tests are  
53 positive, then

54

$$s(t) = p(t - \tau)$$

55 in which  $p(t)$  is the total number of patients infected at time  $t$ , and  $\tau$  is the time  
56 from being infected to being tested positive. Since the patients infected during the time  
57  $\tau$  will not be recorded as nucleic acid positive, the diagnosed or recorded patients ( $s(t)$   
58 above) at time  $t$  is equal to the number of infected population at time  $t - \tau$ .

59 During the time  $dt$ , the number of newly infected patients  $dp(t)$  is

60

$$dp(t) = k \cdot f(t) \cdot dt$$

61 Where  $k$  is the spreading coefficient representing the average number of people one  
62 unquarantined patient can infect in a unit interval, and  $f(t)$  is the number of

---

63 unquarantined patients at time  $t$ .  $f(t)$  is equal to  $p(t)$  subtracted by the number of  
64 quarantined patients  $q(t)$ :

$$65 \quad f(t) = p(t) - q(t)$$

66 We further assume that  $q(t)$  (including both nucleic acid positive patients and their  
67 close contacts) is proportional to  $s(t)$ , and let  $u$  be the average quarantine ratio:

$$68 \quad q(t) = u \cdot s(t) = u \cdot p(t - \tau)$$

69 Therefore, we get the final differential equation:

$$70 \quad \frac{dp(t)}{dt} = k \cdot f(t) = k \cdot [p(t) - q(t)] = k \cdot [p(t) - u \cdot p(t - \tau)]$$

71 In this equation, there are three unknown parameters: the spreading coefficient  $k$ , the  
72 average quarantine ration  $u$ , and the detection interval  $\tau$ . These parameters may vary  
73 during different periods, *e.g.*, before or after the city lockdown. Using the number of  
74 reported cases during a particular time in Shanghai, these three parameters can be  
75 estimated by data fitting. As a next step, we could forecast the trend of Omicron  
76 spreading in Shanghai with these estimated parameters.

77

## 78 **Results**

79 The Omicron epidemic in Shanghai has begun since early March, 2022. Until  
80 March 12, the number of confirmed cases per day did not exceed 100 (**Figure 1**). Due  
81 to the surge in COVID-19 positives since mid-March, the Shanghai municipal  
82 government made the lockdown decision on March 28 to control the spread. So, we  
83 fitted the data of total number of reported cases before and after 28 March to figure out  
84 to what extent the more stringent policy could affect, and we found that the fitting

---

85 between the reported data and the curve calculated from our equation was quite close  
86 (**Figure 2**). We found that, in order to fit the data better, it was needed to alter the  
87 parameter  $\tau$  in the two scenarios: i)  $\tau = 2$  (days) before the city lockdown and ii)  
88  $\tau = 1$  (day) after the city lockdown. This can be construed as that the more stringent  
89 quarantine policy after the city lockdown, with nucleic acid tests for all citizens once  
90 or twice per day, reduced the detection interval  $\tau$ .

91 In addition, we found that the spreading coefficient  $k$  decreased after the city  
92 lockdown, from 1.63 to 1.49, approximately (**Figure 2**). Furthermore, in the early stage  
93 of the epidemic, the quarantine ratio  $u$  was  $1.32 > 1$ , which means that almost all the  
94 patients tested positive as well as their close contacts are quarantined. In the later stage  
95 of the epidemic, the quarantine ratio  $u$  got smaller,  $\sim 1.04$ . The reduced  $u$  may serve  
96 as a sign of the arriving turning point. Since  $p(t)$ , the cumulative number of confirmed  
97 cases, is a non-decreasing function, its derivative,  $\frac{dp(t)}{dt}$ , has to be greater than or equal  
98 to 0. Therefore,  $u$  must be smaller than or equal to  $\frac{p(t)}{p(t-\tau)}$ . At the beginning of the  
99 epidemic, Omicron was spreading quickly,  $p(t)$  was much larger than  $p(t - \tau)$ , so  $u$   
100 was relatively bigger. As a result of reaching the turning point, Omicron spreading has  
101 slowed down, thus  $p(t)$  was not much different from  $p(t - \tau)$ ,  $\frac{p(t)}{p(t-\tau)}$  was close to  
102 1, which made the quarantine ratio  $u$  smaller than that in the early stage of the  
103 epidemic.

104 With the three parameters estimated, the trend of Omicron spreading in the near  
105 future was predicted. We concluded that there will be more than 300,000 people  
106 infected in Shanghai during this Omicron outbreak (**Figure 3A**). And the number of

---

107 confirmed cases per day will start to decrease around April 13 (**Figure 3B**), which is  
108 the so-called turning point.

109 We found that the average detection interval  $\tau$  was 1 or 2 days when fitting the  
110 known data, which means that, there would be 1 to 2 days of delay from infection to  
111 positive nucleic acid test, during which time the unnoticed patients were still infectious.  
112 We believe that this is one of the reasons why Omicron spread rapidly. Furthermore,  
113 the quarantine ratio  $u$  was found to be greater than 1, which means that most of the  
114 infected and close contacts had been quarantined, indicating the lockdown and other  
115 stringent policies were effective, making appearance of the turning point and quelling  
116 the epidemic possible.

117 Moreover, the apparent  $R_0$  value, which is the number of people a patient could  
118 infect, could be obtained by multiplying the spreading coefficient  $k$  and the detection  
119 interval  $\tau$ . After the lockdown, the value of  $R_0$  dropped from 3.27 to 1.49, providing  
120 further supporting evidence for the positive effects of the lockdown.

121

## 122 **Discussion**

123 The sudden Omicron epidemic outbreak in Shanghai has brought panic to the  
124 public, and great loss to business. In order to evaluate and forecast the spreading trend  
125 based on available confirmed data, we proposed a novel mathematical model, which  
126 took the government policies into account, which could provide us important  
127 parameters describing the Omicron epidemic such as the spreading coefficient  $k$ , the  
128 quarantine ratio  $u$ , and the detection interval  $\tau$ . The predicted number of overall cases

129 and the expected time of turning point may help the government to make judgment on  
130 the spreading and to revise the policies accordingly. Our model is easy to be applied to  
131 describe other epidemic diseases, and can help the society to avoid panic and build up  
132 confidence to fight with COVID-19. For example, the Guangzhou city was the latest  
133 metropolitan city in China that declared city-wise lockdown on Apr 11. We believe that  
134 our mathematical model presented in this report would help the public to have a better  
135 grasp of the current pandemic spread, and would undoubtedly instill confidence and  
136 calm that are urgently needed in the caught-up fight of COVID-19 in China.

137

### 138 **Figure legends**

139 Figure 1. The total number of confirmed cases in Shanghai since March 1. The blue  
140 points and curve represent the data before the official lockdown, and the red ones  
141 represent the data after the lockdown.

142

143 Figure 2. Data fitting. The data were fitted separately before and after the lockdown.  
144 The blue points and curve represented the reported number of total confirmed cases,  
145 and the yellow ones represented the number calculated from our differential equation.  
146 The parameters were rounded to 3 significant digits.

147

148 Figure 3. Epidemic trend forecast. (A) The forecasted total number of confirmed cases,  
149 with the predicted data points colored in blue. (B) The reported daily increased number  
150 of cases (red) and those for upcoming days predicted by our model (blue).

151

152 **Tables**

153 Table 1. The number of COVID-19 cases in Shanghai

| Daily infected (*) | Total infected (*) | Date |
|--------------------|--------------------|------|
| 1                  | 1                  | 3.1  |
| 5                  | 6                  | 3.2  |
| 14                 | 20                 | 3.3  |
| 16                 | 36                 | 3.4  |
| 28                 | 64                 | 3.5  |
| 48                 | 112                | 3.6  |
| 55                 | 167                | 3.7  |
| 65                 | 232                | 3.8  |
| 80                 | 312                | 3.9  |
| 75                 | 387                | 3.10 |
| 83                 | 470                | 3.11 |
| 65                 | 535                | 3.12 |
| 169                | 704                | 3.13 |
| 9                  | 713                | 3.14 |
| 202                | 915                | 3.15 |
| 158                | 1073               | 3.16 |
| 260                | 1333               | 3.17 |
| 374                | 1707               | 3.18 |
| 509                | 2216               | 3.19 |
| 758                | 2974               | 3.20 |
| 896                | 3870               | 3.21 |
| 981                | 4851               | 3.22 |
| 983                | 5834               | 3.23 |
| 1609               | 7443               | 3.24 |
| 2269               | 9712               | 3.25 |
| 2678               | 12390              | 3.26 |
| 3500               | 15890              | 3.27 |
| 4477               | 20367              | 3.28 |
| 5982               | 26349              | 3.29 |
| 5653               | 32002              | 3.30 |
| 4502               | 36504              | 3.31 |
| 6311               | 42815              | 4.1  |
| 8226               | 51041              | 4.2  |
| 9006               | 60047              | 4.3  |
| 13354              | 73401              | 4.4  |
| 17077              | 90478              | 4.5  |
| 19982              | 110460             | 4.6  |



---

| Daily infected (*) | Total infected (*) | Date |
|--------------------|--------------------|------|
| 21222              | 131682             | 4.7  |
| 23624              | 155306             | 4.8  |
| 24943              | 180249             | 4.9  |
| 26087              | 206336             | 4.10 |

---

\* Data source: Shanghai Municipal Health Commission (<https://wsjkw.sh.gov.cn/xwfb/index.html>) and Global Times (<https://www.huanqiu.com>)

154

## 155 **Acknowledgements**

156 This work was supported by research grants 81970132, 81770142, 81800144,  
157 31800642, 82100153 and 82104582 from National Natural Science Foundation of  
158 China, a research grant 20JC1410600 from Shanghai Science and Technology  
159 Committee, Shanghai Guangci Translational Medical Research Development  
160 Foundation, a research grant 20152504 from “Shanghai Municipal Education  
161 Commission—Gaofeng Clinical Medicine Grant Support”, “The Program for Professor  
162 of Special Appointment (Eastern Scholar) at Shanghai Institute of Higher Learning”,  
163 Samuel Waxman Cancer Research Foundation. We thanks Professor Zhu Chen,  
164 Shanghai Institute of Hematology, for his kind support of this work.

165

## 166 **Author contributions**

167 Conceived and designed the experiments: GM and GW. Performed the experiments:  
168 MJ. Analyzed the data, preparation of figures manuscripts and wrote the paper: MJ,  
169 GM, GW. Project supervision: GM. All authors read and approved the final manuscript.

170

## 171 **Compliance with ethics guidelines**

## 172 **Conflict of interest**

173 This article does not contain any studies with human or animal subjects. The authors  
174 declare no competing interests.

175

176 **References**

- 177 1. Team, C.C.-R., SARS-CoV-2 B.1.1.529 (Omicron) Variant - United States,  
178 December 1-8, 2021. MMWR Morb Mortal Wkly Rep, 2021. 70(50): p. 1731-1734.
- 179 2. Karim, S.S.A. and Q.A. Karim, Omicron SARS-CoV-2 variant: a new chapter in  
180 the COVID-19 pandemic. Lancet, 2021. 398(10317): p. 2126-2128.
- 181 3. Del Rio, C., S.B. Omer, and P.N. Malani, Winter of Omicron-The Evolving  
182 COVID-19 Pandemic. JAMA, 2022. 327(4): p. 319-320.

183



### The number of COVID-19 cases detected in Shanghai before lockdown

$k = 1.63, u = 1.32$

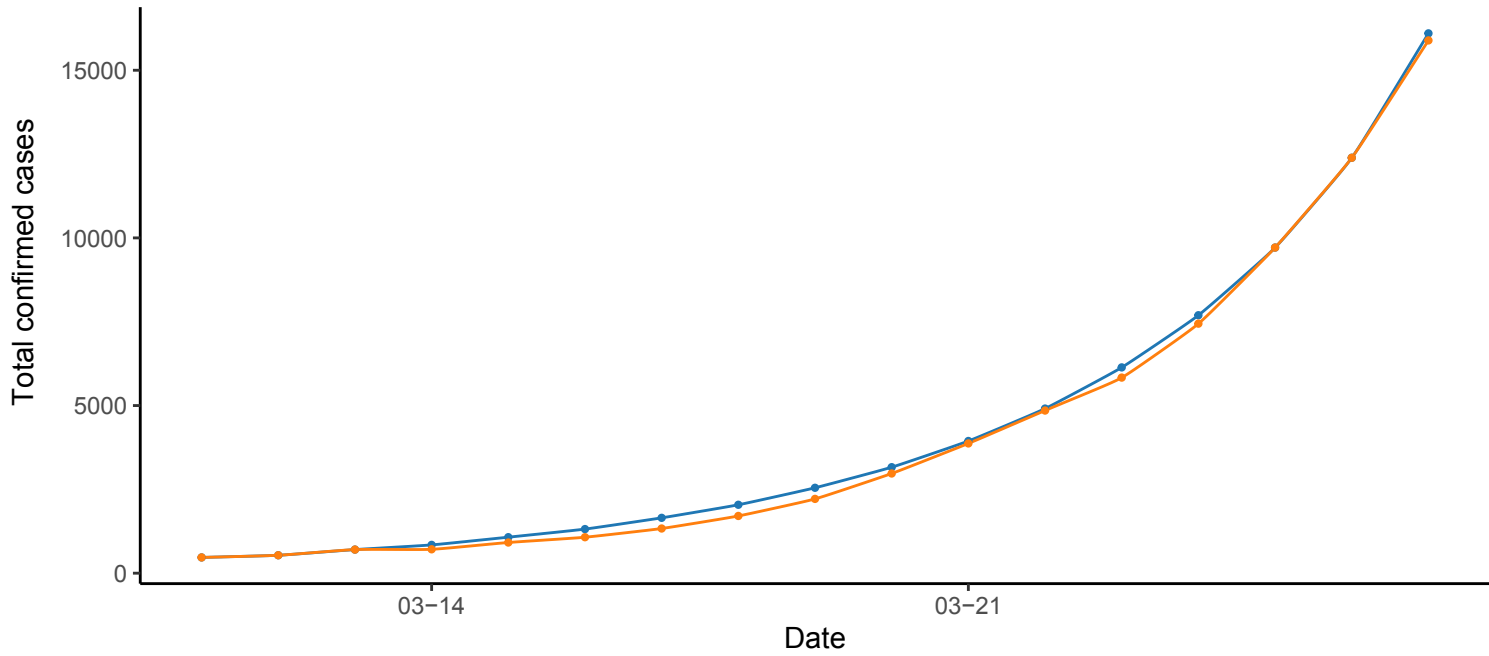

### The number of COVID-19 cases detected in Shanghai after lockdown

$k = 1.49, u = 1.04$

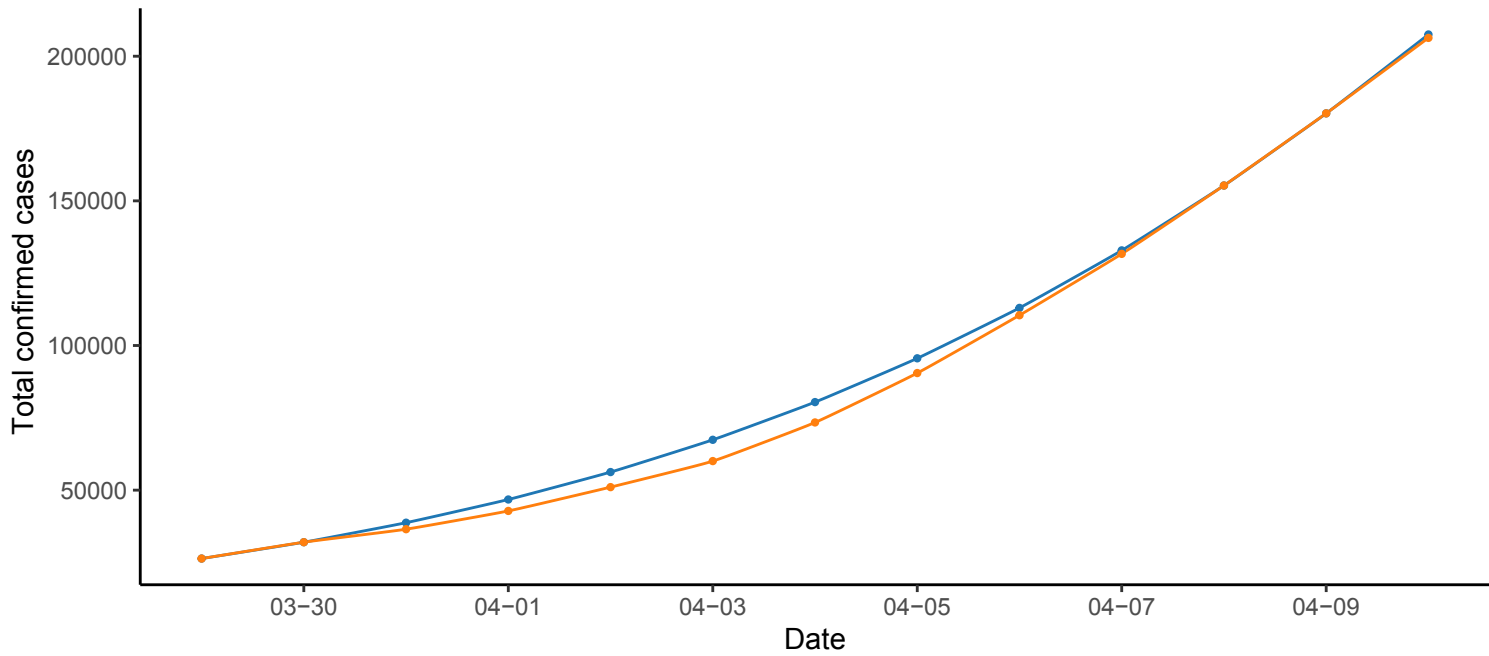

Type — predicted — real

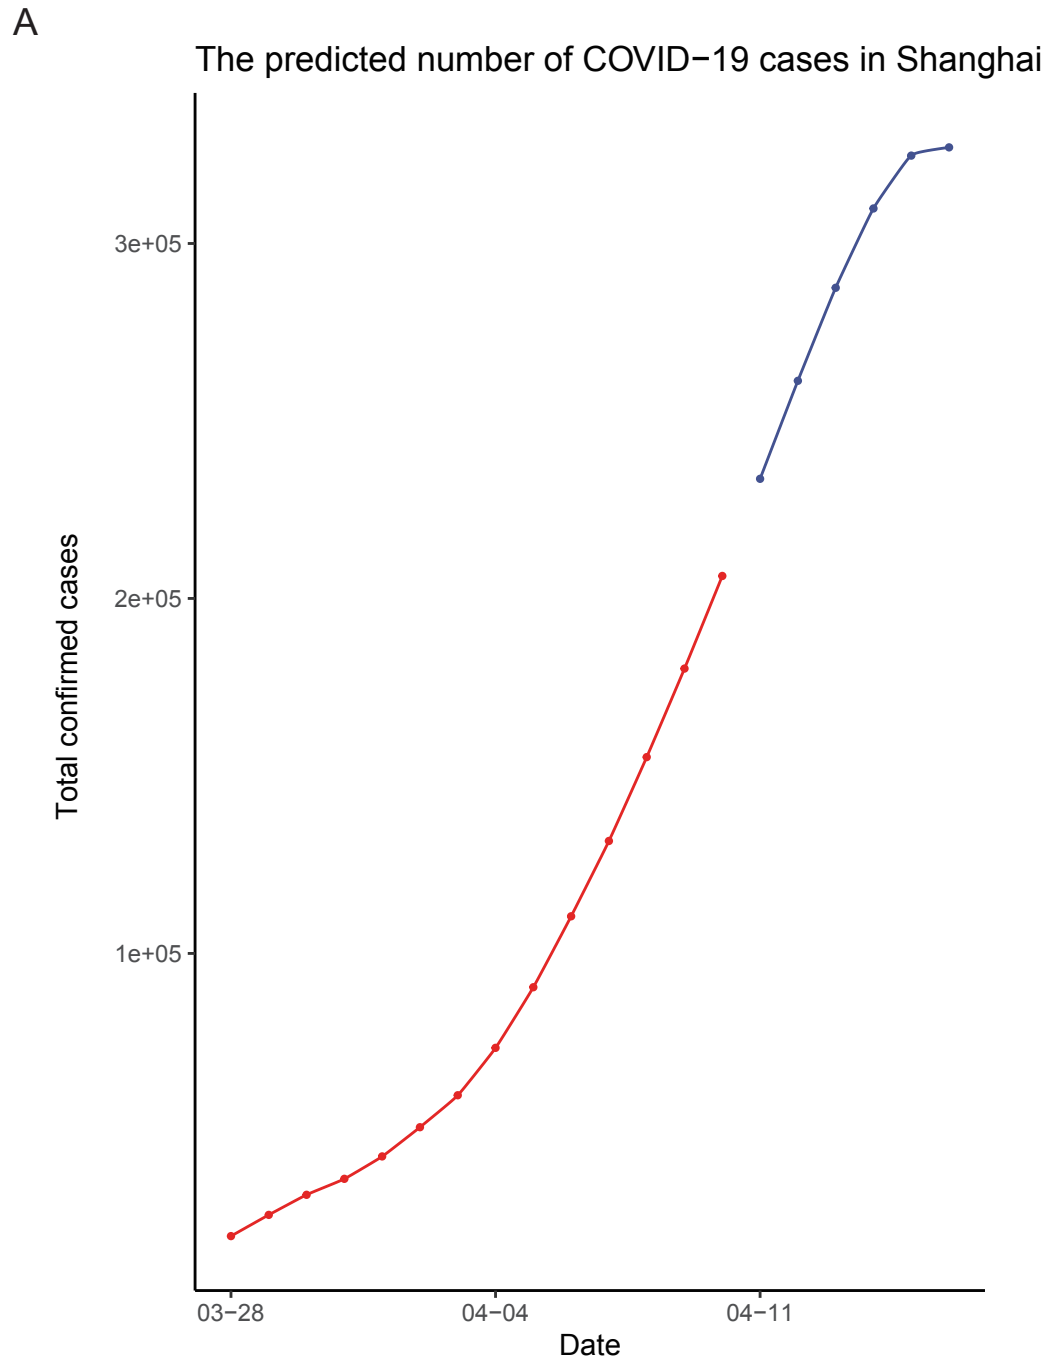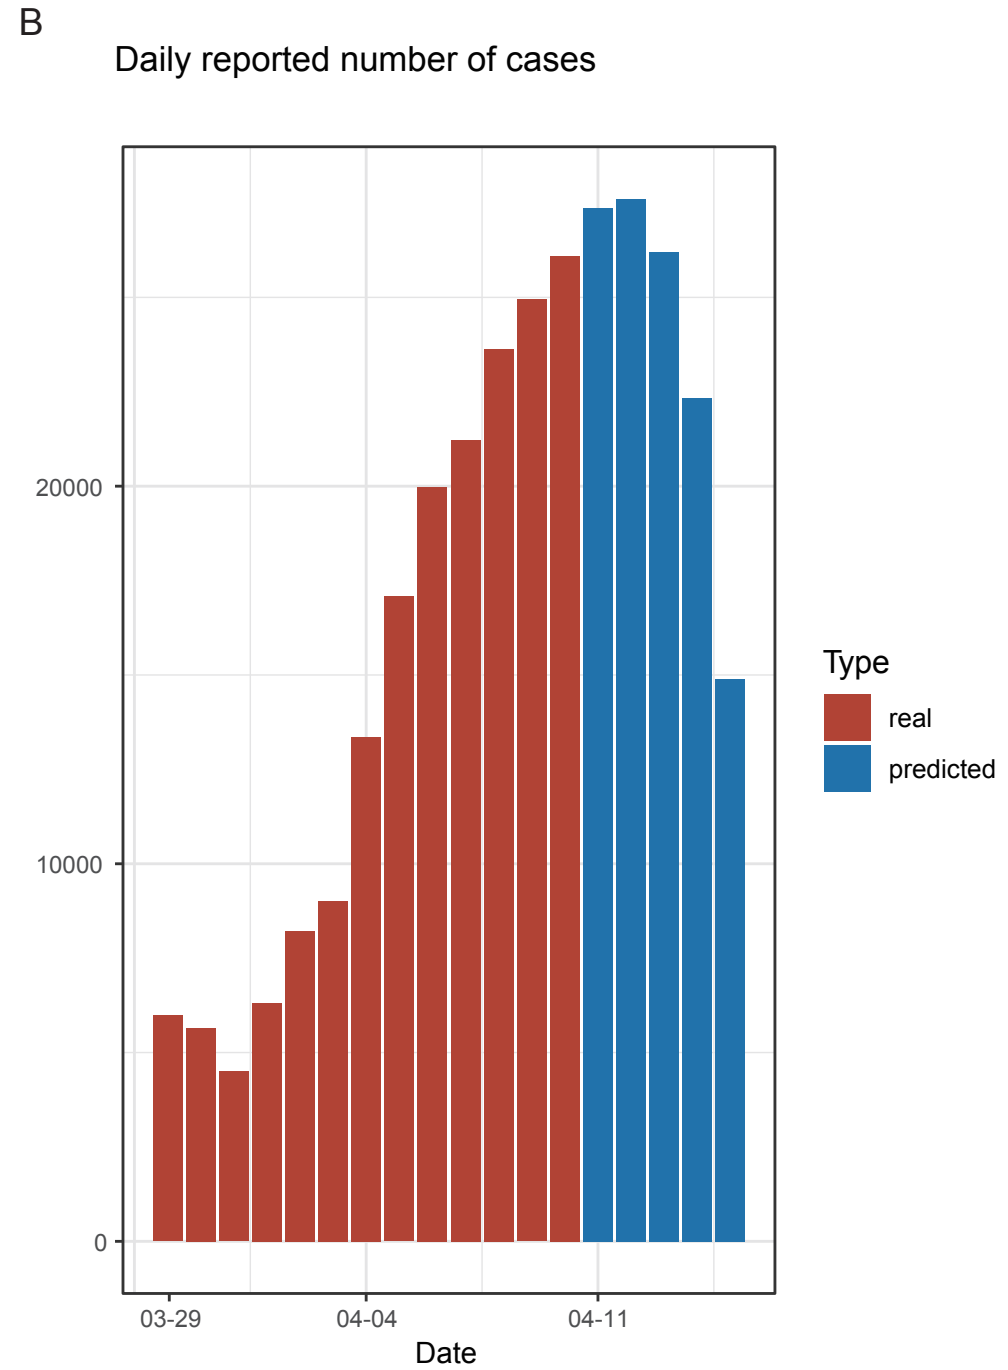

Source: https://medrxiv.org/content/10.1101/2022.04.13.22273788v1.full.pdf
